# Supplementary material
Source: Springer Nature journal article supplement (https://www.springermedizin.de/resource/supplementary/12889_2014_7398_MOESM2_ESM.pdf/9497328)
Supplement: MOESM2 [file 9497328]

1 **Table 1: HIV In-Home Self-Test Voucher Use Survey Participant Characteristics**  
 2 **Los Angeles, 2013**

| <b>Survey Response</b>                     | <b>Total (n=50)</b>              |
|--------------------------------------------|----------------------------------|
| Age (years) :                              |                                  |
| <b>18-25</b>                               | 19 (38%)                         |
| <b>26-35</b>                               | 26 (52%)                         |
| <b>36+</b>                                 | 4 (8%)                           |
| Race:                                      |                                  |
| <b>White</b>                               | 4 (8%)                           |
| <b>Black</b>                               | 44 (88%)                         |
| <b>Other</b>                               | 3 (6%)                           |
| Sexual behavior and gender identification: |                                  |
| <b>Men who have sex with women</b>         | 1 (2%)                           |
| <b>Women who have sex with men</b>         | 9 (18%)                          |
| <b>Men who have sex with men</b>           | 33 (66%)                         |
| <b>Women who have sex with women</b>       | 2 (4%)                           |
| <b>Transwomen</b>                          | 5 (10%)                          |
| Number of new sex partners past 12 months: |                                  |
| <b>0 to 1</b>                              | 17 (34%)                         |
| <b>2 to 3</b>                              | 6 (12%)                          |
| <b>3 to 4</b>                              | 13 (26%)                         |
| <b>5+</b>                                  | 14 (28%)                         |
| Condom Use                                 |                                  |
| <b>Every time</b>                          | 13 (26%)                         |
| <b>Frequently or usually</b>               | 29 (48%)                         |
| <b>Sometimes or less</b>                   | 8 (16%)                          |
| Last HIV Test:                             |                                  |
| <b>3 months or less</b>                    | 10 (20%)                         |
| <b>3-6 months</b>                          | 7 (14%)                          |
| <b>6-9 months</b>                          | 10 (20%)                         |
| <b>9-12 months</b>                         | 8 (16%)                          |
| <b>12+ months</b>                          | 15 (30%)                         |
| Voucher Redemptions:                       |                                  |
| <b>Redeemed</b>                            | 49 (98%)                         |
| <b>Did not redeem</b>                      | 1 (2%)                           |
| <b>Survey Response</b>                     |                                  |
| <b>For those that redeemed the voucher</b> | <b>Total (n=49)</b>              |
| Reported Test Result                       |                                  |
| <b>Positive</b>                            | 3* (6.1%)                        |
| <b>Negative</b>                            | 44 (89.8%)                       |
| <b>Not disclosed</b>                       | 2** (4.1%)                       |
| Activities Before taking the test:         |                                  |
| <b>Engaged in Pre-Test Activity</b>        | 44 (89.9%)                       |
| Activities After Taking the Test:          |                                  |
| <b>Engaged in Post-Test Activity</b>       | 37 (75.5%)                       |
| * All 3 reported linkage to care           | ** Both reported linkage to care |
